# Supplementary material
Source: PubMed Central journal article supplement (PMC9119094)
Supplement: iai.00059-22-s0001.pdf [file iai.00059-22-s0001.pdf]

## Supplementary materials

Controlled proteolysis of an essential virulence determinant dictates infectivity of Lyme disease pathogens

Meghna Thakur, Sandhya Bista, Xiuli Yang, Shelby D. Foor, Michael Ronzetti, Vipin S. Rana, Chrysoula Kitsou, Sara B. Linden, Shraboni Dutta, Amanda S. Altieri, Bolormaa Baljinnyam, Daniel Nelson, Anton Simeonov and Utpal Pal

Contains Fig. S1, Fig. S2, Table S1 and Table S2 and Legends to Supplementary Figures

Figure S1

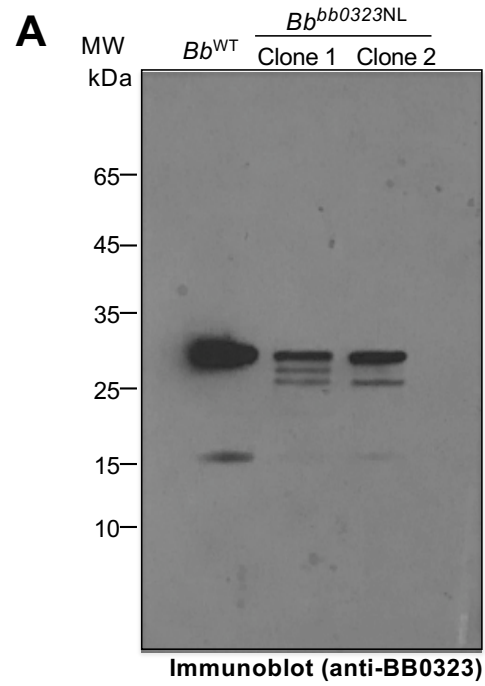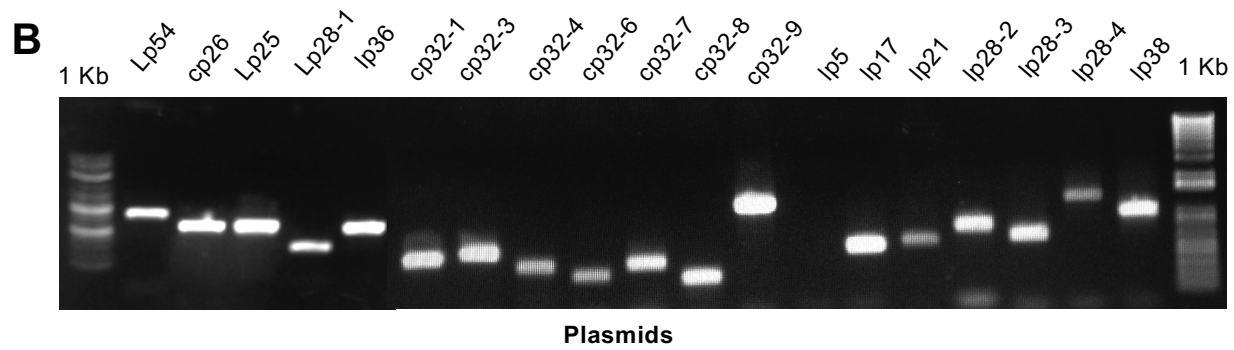

Figure S2

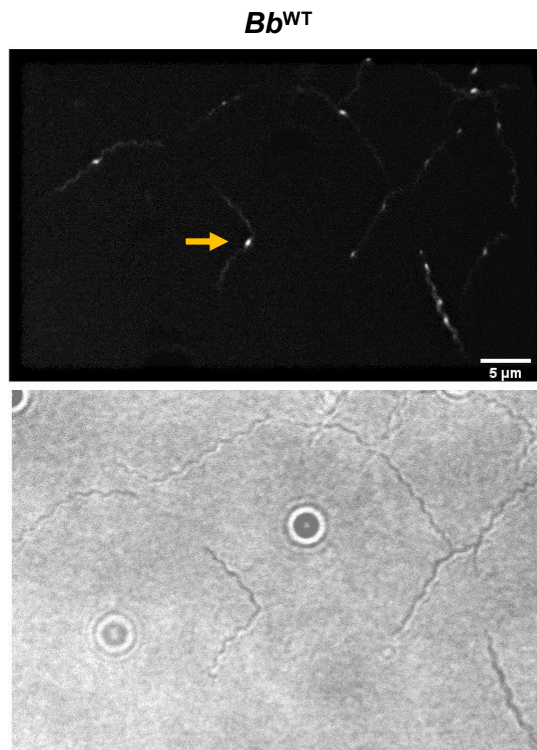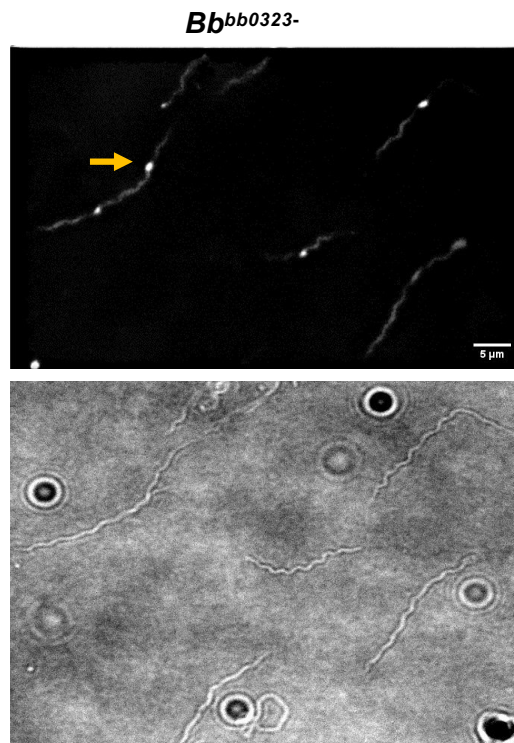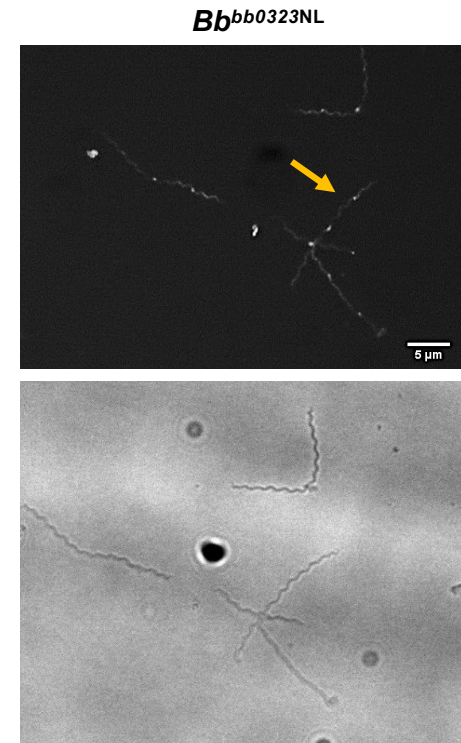

## Legends to Supplementary Figures

### **Figure S1. BB0323 protein and endogenous plasmid analysis in *Bb*<sup>bb0323NL</sup>**

**isolates. A:** Immunoblot showing aberrant expression of BB0323 in the two independent cleavage site mutants (*Bb*<sup>bb0323NL</sup> and *Bb*<sup>bb0323NLA</sup>). **B:** The plasmid analysis. The *Bb*<sup>bb0323NL</sup> isolate retains all plasmids, except for a non-essential plasmid lp5. DNA was isolated from *B. burgdorferi* isolates and used in polymerase chain reaction for the detection of endogenous plasmids using specific primer sets

**Figure S2. *B. burgdorferi* peptidoglycan labeling.** Fluorescence and phase-contrast micrographs wild type and mutant *B. burgdorferi* labeled with HADA.

**Table S1:** Culture analysis of infected murine tissues

| <b>Strain</b>                       | <b>Number of Positive tissue culture<br/>/Number of mice examined</b> |               |              |              |
|-------------------------------------|-----------------------------------------------------------------------|---------------|--------------|--------------|
|                                     | <b>Skin</b>                                                           | <b>Spleen</b> | <b>Heart</b> | <b>Total</b> |
| <b><i>Bb</i><sup>WT</sup></b>       | <b>3/3</b>                                                            | <b>3/3</b>    | <b>3/3</b>   | <b>9/9</b>   |
| <b><i>Bb</i><sup>bb0323-</sup></b>  | <b>0/3</b>                                                            | <b>0/3</b>    | <b>0/3</b>   | <b>0/9</b>   |
| <b><i>Bb</i><sup>bb0323NL</sup></b> | <b>0/3</b>                                                            | <b>0/3</b>    | <b>0/3</b>   | <b>0/9</b>   |

**Supplementary Table S2:** Oligonucleotide primers used in this study

| Sequence (5' → 3')                        | Purpose                                                   |
|-------------------------------------------|-----------------------------------------------------------|
| CAGTCACTTAGCCGCTTTAAATACTAATAAAGACACTTATC | Forward primers for N236A/L237A site-directed mutagenesis |
| TTTCTTTCTTTAATGAATGCTCTAC                 | Reverse primers for N236A/L237A site-directed mutagenesis |
| TTGCTGATCAAGCTCAATATAACCA                 | Forward primer <i>B. burgdorferi flaB</i> qRT-PCR         |
| TTGAGACCCTGAAAGTGATGC                     | Reverse primer <i>B. burgdorferi flaB</i> qRT-PCR         |
| AGAGGGAAATCGTGCGTGAC                      | Forward primer mouse $\beta$ -actin qRT-PCR               |
| CAATAGTGATGACCTGGCCGT                     | Reverse primer mouse $\beta$ -actin qRT-PCR               |
| GGTATCGTGCTCGACTC                         | Forward primer tick $\beta$ -actin qRT-PCR                |
| ATCAGGTAGTCGGTCAGG                        | Reverse primer tick $\beta$ -actin qRT-PCR                |
